# Supplementary material for: Dietary Red Meat Adversely Affects Disease Severity in a Pig Model of DSS-Induced Colitis Despite Reduction in Colonic Pro-Inflammatory Gene Expression
Source: PubMed Central journal article supplement (PMC7353045; doi:10.3390/nu12061728), 2020-06-09
Supplement: nutrients-12-01728-s001.pdf [file nutrients-12-01728-s001.pdf]

**Suppl. Table 1.** Oligonucleotide sequences of forward primer, probe (in case it was used) and reverse primer for the studied genes

| Gene symbol         | Method | Assay ID. TaqMan,<br>Life Technologies | Forward Primer                | Probe                        | Reverse Primer              |
|---------------------|--------|----------------------------------------|-------------------------------|------------------------------|-----------------------------|
| PTSG2               | TaqMan | Ss03394694_mL                          |                               |                              |                             |
| IL17A               | TaqMan | Ss03391803_mL                          |                               |                              |                             |
| TGF $\beta$         | TaqMan | Ss03382325_uL                          |                               |                              |                             |
| IL6                 | TaqMan |                                        | 5'-tcctcgcaaaatctctgcaat      | FAM-5'-tttcacacatctccttctc   | 5'-tccttgctgtttcacacttctcat |
| IL8                 | TaqMan |                                        | 5'-tcctgctttctgcagctctct      | FAM-5'-tgaggctgcagttct       | 5'-catcgaagtctgcacttactcttg |
| IL10                | TaqMan |                                        | 5'-gaggaggtgaagagtgcttta      | FAM-5'-cctctcttgagcttgc      | 5'-ctcacatggctttagaca       |
| TNF $\alpha$        | TaqMan |                                        | 5'-aacctctggccaagga           | FAM-5'-tcagatcatcgtctcaaac   | 5'-ggcgacggcttatctga        |
| NF $\kappa$ $\beta$ | TaqMan |                                        | 5'-ctagtgaaccgaaacctttctactat | FAM-5'-ctgaaatcaaagataaagagg | 5'-gcttctgccgttctcttgt      |
| $\beta$ -actin      | TaqMan |                                        | 5'-tccagaggcgctctcca          | VIC-5'-tcctggcatggagt        | 5'-cgcacttcatgatcgagttga    |
| GAPDH               | TaqMan |                                        | 5'- gtcggagtgaacggattgg       | 5'-cgctggtcaccagggtgct       | 5'-caatgtccactttgccagagttaa |
